# Supplementary material for: Serum IGFBP-1 as a potential biomarker for diagnosis of early-stage upper gastrointestinal tumour
Source: PubMed Central journal article supplement — eBioMedicine. 2020 Jan 3;51:102566. doi: 10.1016/j.ebiom.2019.11.027 (PMC6956950; doi:10.1016/j.ebiom.2019.11.027), 2020-01-03
Supplement: mmc1.pdf [file mmc1.pdf]

**Supplementary Table S1. Participant details and clinicopathological characteristics in biomarker discovery stage**

|                   | ESCC (n=20) | Normal control (n=20) | p value            |
|-------------------|-------------|-----------------------|--------------------|
| Age (Mean, range) | 56, 45-68   | 56, 40-70             | 0.977 <sup>†</sup> |
| Gender            |             |                       |                    |
| Male              | 17          | 16                    | 1.000 <sup>‡</sup> |
| Female            | 3           | 4                     |                    |
| T stage           |             |                       |                    |
| T1+T2             | 1           |                       |                    |
| T3+ T4            | 19          |                       |                    |
| N stage           |             |                       |                    |
| Negative          | 2           |                       |                    |
| Positive          | 18          |                       |                    |
| TNM stage         |             |                       |                    |
| III               | 4           |                       |                    |
| IV                | 16          |                       |                    |

ESCC, oesophageal squamous cell carcinoma. <sup>†</sup>Mann-Whitney U test. <sup>‡</sup>Pearson chi-square test.

**Supplementary Table S2. Clinicopathological characteristics of all individuals by tumour type and subgroup in biomarker assessment stage**

|                        | Normal control | Tumor type |            |                |
|------------------------|----------------|------------|------------|----------------|
|                        |                | ESCC       | EJA        | Stomach cancer |
| No. of participants    | 333            | 287        | 237        | 207            |
| From CHSUMC            | 333            | 287        | 204        | 152            |
| From SYSUCC            | -              | -          | 34         | 55             |
| Age (years)            | 56 (40-79)     | 59 (41-83) | 64 (31-87) | 57 (26-81)     |
| Gender                 |                |            |            |                |
| Male                   | 239            | 208        | 189        | 136            |
| Female                 | 94             | 79         | 48         | 71             |
| T stage                |                |            |            |                |
| Tis+T1+T2              |                | 74         | 25         | 34             |
| T3+ T4                 |                | 213        | 212        | 173            |
| N stage                |                |            |            |                |
| Negative               |                | 144        | 73         | 57             |
| Positive               |                | 143        | 164        | 150            |
| M stage                |                |            |            |                |
| M0                     |                | 298        | 231        | 182            |
| M1                     |                | 0          | 6          | 25             |
| TNM stage <sup>†</sup> |                |            |            |                |
| 0+I+II (early)         |                | 118        | 56         | 66             |
| III+IV (advanced)      |                | 169        | 181        | 141            |

<sup>†</sup>All TNM stages in ESCC, EJA, and stomach cancer were pTNM stages. CHSUMC, Cancer Hospital of Shantou University Medical College; SYSUCC, Sun Yat-Sen University Cancer Centre. ESCC, oesophageal squamous cell carcinoma. EJA, oesophagogastric junction adenocarcinoma.

**Supplementary Table S3. Clinicopathological characteristics of participants evaluated in ESCC validation cohorts**

|                   | Validation cohort 1 (CHSUMC) |                | Validation cohort 2 (SYSUCC) |                |
|-------------------|------------------------------|----------------|------------------------------|----------------|
|                   | ESCC (n=307)                 | Normal (n=165) | ESCC (n=262)                 | Normal (n=190) |
| Age (years)       | 60 (42-77)                   | 57 (40-84)     | 61 (39-83)                   | 56 (41-80)     |
| Gender            |                              |                |                              |                |
| Male              | 232                          | 110            | 208                          | 147            |
| Female            | 75                           | 55             | 54                           | 43             |
| T stage           |                              |                |                              |                |
| Tis               | 6                            |                | 7                            |                |
| T1+T2             | 72                           |                | 98                           |                |
| T3+ T4            | 229                          |                | 157                          |                |
| N stage           |                              |                |                              |                |
| Negative          | 145                          |                | 133                          |                |
| Positive          | 162                          |                | 129                          |                |
| M stage           |                              |                |                              |                |
| M0                | 307                          |                | 261                          |                |
| M1                | 0                            |                | 1                            |                |
| pTNM stage        |                              |                |                              |                |
| 0+I+II (early)    | 97                           |                | 141                          |                |
| III+IV (advanced) | 210                          |                | 121                          |                |

CHSUMC, Cancer Hospital of Shantou University Medical College; SYSUCC, Sun Yat-Sen University Cancer Centre.  
ESCC, oesophageal squamous cell carcinoma.

**Supplementary Table S4. 113 candidate Proteins/Cytokines displaying higher levels in patients with oesophageal squamous cell carcinoma than normal controls (fold change > 1.5) with the use of Human Antibody Array AAH-BLG-1000**

| Protein/Cytokine name | Fold change      | p value (Student t test) |
|-----------------------|------------------|--------------------------|
| GDF3                  | 1.8035028        | <0.001                   |
| Kallikrein 2          | 1.6731764        | 0.001                    |
| IGFBP-3               | 1.5227792        | <0.001                   |
| IL-17R                | 1.5404811        | 0.0012                   |
| CRIM 1                | 2.4942821        | 0.0020                   |
| Hepassocin            | 1.6741045        | 0.0035                   |
| SAA                   | 1.8737404        | 0.0035                   |
| IGFBP-2               | 1.5690116        | 0.0020                   |
| TGF-beta RII          | 1.7093058        | 0.0027                   |
| Tie-2                 | 1.6903881        | 0.0031                   |
| Vasorin               | 1.5378916        | 0.0036                   |
| MMP-9                 | 1.8050232        | 0.0058                   |
| G-CSF R/CD 114        | 1.5088181        | 0.0036                   |
| TNF RI/TNFRSF1A       | 1.6451376        | 0.0048                   |
| IL-1 F8/FIL1 eta      | 1.6211737        | 0.0069                   |
| uPAR                  | 1.5849424        | 0.0072                   |
| IL-20 R alpha         | 1.5916308        | 0.0062                   |
| <b>IGFBP-1</b>        | <b>1.7715375</b> | <b>0.0087</b>            |
| D-Dimer               | 1.6075582        | 0.0109                   |
| Cytokeratin 8         | 1.5482369        | 0.0084                   |
| IL-1 sRI              | 1.5593007        | 0.0303                   |
| IL-2 R alpha          | 1.5464675        | 0.0132                   |
| FLRG                  | 1.5356399        | 0.0114                   |
| TL1A/TNFSF15          | 1.6961292        | 0.0127                   |
| Tarc                  | 1.530441         | 0.0135                   |
| MMP-13                | 1.5900909        | 0.0153                   |
| Cyclin D1             | 1.5619329        | 0.0145                   |
| TIMP-4                | 1.5036094        | 0.0155                   |
| VEGF-C                | 1.5676667        | 0.0110                   |
| Endoglin/CD105        | 1.5716644        | 0.0157                   |
| TWEAK/TNFSF12         | 1.6882888        | 0.0145                   |
| HCC-4/CCL16           | 1.5318565        | 0.0151                   |
| TRAIL R4/TNFRSF10D    | 1.6440075        | 0.0148                   |
| IL-2 R gamma          | 1.5366708        | 0.0162                   |
| Tie-1                 | 1.5736473        | 0.0183                   |
| FGF R3                | 1.5044494        | 0.0174                   |
| TRAIL/TNFSF10         | 1.5620742        | 0.0168                   |
| MMP-15                | 1.6827519        | 0.0184                   |
| IL-31                 | 1.5694644        | 0.0199                   |
| SSEA-1                | 1.5138386        | 0.0183                   |
| 11b-HSD1              | 1.6855077        | 0.0234                   |
| TPA                   | 1.634865         | 0.0214                   |
| Activin B             | 1.5602187        | 0.0204                   |
| NAIP                  | 2.0679363        | 0.0223                   |
| Pentraxin3/TSG-14     | 1.6804978        | 0.0238                   |
| SCF R/CD117           | 1.7447789        | 0.0251                   |

|                           |           |        |
|---------------------------|-----------|--------|
| TRAIL R1/DR4/TNFRSF10A    | 1.629491  | 0.0265 |
| E-Selectin                | 1.5091642 | 0.0269 |
| CRTAM                     | 1.7215272 | 0.0265 |
| IL-6 R                    | 1.5060397 | 0.0261 |
| IL-31 RA                  | 1.5151084 | 0.0221 |
| TGF-beta RIIB             | 1.6557479 | 0.0263 |
| IL-2 R beta/CD122         | 1.5955901 | 0.0285 |
| FADD                      | 1.6100827 | 0.0274 |
| IL-10 R alpha             | 1.5291912 | 0.0293 |
| Kremen-1                  | 2.1217453 | 0.0312 |
| IL-20                     | 1.5969367 | 0.0310 |
| BMP-9                     | 1.606016  | 0.0295 |
| PDGF-C                    | 1.5640764 | 0.0245 |
| Lipocalin-2               | 1.6206074 | 0.0356 |
| Osteocalcin               | 1.664953  | 0.0307 |
| Siglec-5/CD170            | 1.5354307 | 0.0291 |
| S100A10                   | 1.6715426 | 0.0301 |
| FGF-BP                    | 1.630238  | 0.0315 |
| ADAM-9                    | 1.6024065 | 0.0271 |
| Activin RIA/ALK-2         | 1.6983134 | 0.0397 |
| CV-2/Crossveinless-2      | 1.5351625 | 0.0346 |
| Osteoprotegerin/TNFRSF11B | 1.672582  | 0.0370 |
| LRP-6                     | 1.5854083 | 0.0354 |
| WIF-1                     | 1.5593254 | 0.0415 |
| Persephin                 | 1.6455155 | 0.0391 |
| CD200                     | 1.7097643 | 0.0391 |
| Kallikrein 10             | 1.6372859 | 0.0407 |
| IL-28A                    | 1.5445768 | 0.0402 |
| OX40 Ligand/TNFSF4        | 1.5543465 | 0.0395 |
| TLR1                      | 1.5361133 | 0.0434 |
| Leptin (OB)               | 1.5429587 | 0.0338 |
| Prohibitin                | 1.5397471 | 0.0328 |
| ENA-78                    | 1.5301049 | 0.0450 |
| 2B4                       | 1.6332297 | 0.0440 |
| IFN-alpha/beta R2         | 1.5173295 | 0.0403 |
| FGF-21                    | 1.5427336 | 0.0439 |
| SLPI                      | 1.5227405 | 0.0359 |
| VEGI/TNFSF15              | 1.5167945 | 0.0483 |
| Osteocrin                 | 1.6212424 | 0.0466 |
| LRP-1                     | 1.5125739 | 0.0448 |
| EDAR                      | 1.5462306 | 0.0513 |
| EMAP-II                   | 1.5270894 | 0.0523 |
| Insulin                   | 1.6800395 | 0.0570 |
| Soggy-1                   | 1.5118312 | 0.0554 |
| Flt-3 Ligand              | 1.5175439 | 0.0627 |
| IL-22 BP                  | 1.5020193 | 0.0582 |
| Thymopoietin              | 1.6221846 | 0.0623 |
| MMP-12                    | 1.7369081 | 0.0629 |
| KLF4                      | 1.6683389 | 0.0627 |
| Eotaxin/CCL11             | 1.5006744 | 0.0663 |

|                     |           |        |
|---------------------|-----------|--------|
| PPP2R5C             | 1.7309814 | 0.0754 |
| Activin C           | 1.6981542 | 0.0907 |
| Defensin            | 1.6560152 | 0.1271 |
| ApoH                | 1.6123374 | 0.0974 |
| Lyn                 | 1.5705767 | 0.1151 |
| FGF-12              | 1.5011377 | 0.0993 |
| GPI                 | 1.5404518 | 0.1275 |
| PI 3Kinase p85 beta | 1.8410221 | 0.1463 |
| NPTX1               | 1.5102713 | 0.1431 |
| hCGb                | 1.5772239 | 0.1338 |
| IFN-gamma R1        | 1.8372062 | 0.1420 |
| VIP Receptor 2      | 1.5293754 | 0.1310 |
| SERPING1            | 1.8440742 | 0.1586 |
| ACTH                | 1.5051708 | 0.1440 |
| Layilin             | 1.9195336 | 0.1627 |
| MMP-25/MT6-MMP      | 1.7710939 | 0.1475 |
| Orexin B            | 2.1162364 | 0.1700 |

---

**Supplementary Table S5. 39 candidate Proteins/Cytokines displaying higher levels in patients with oesophageal squamous cell carcinoma than normal controls (fold change > 1.5) with the use of with Human Cytokine Array AAH-CYT-G4000**

| Protein/Cytokine name | Fold change       | p value (Student t test) |
|-----------------------|-------------------|--------------------------|
| MICA                  | 1.87296537        | <0.001                   |
| EGF                   | 2.045899058       | <0.001                   |
| OPN                   | 3.205881542       | <0.001                   |
| ErbB3                 | 1.608572995       | 0.001                    |
| MMP-8                 | 2.013110101       | 0.003                    |
| MIF                   | 3.092384427       | 0.001                    |
| beta2 M               | 1.718732038       | 0.003                    |
| Ferritin              | 2.61888299        | 0.004                    |
| CEACAM-1              | 1.571837362       | 0.003                    |
| MIP-1beta             | 2.470839554       | 0.009                    |
| <b>IGFBP-1</b>        | <b>1.56596948</b> | <b>0.011</b>             |
| MMP-1                 | 2.359251189       | 0.016                    |
| IL-8                  | 2.990857414       | 0.022                    |
| uPAR                  | 1.74913755        | 0.019                    |
| MCP-2                 | 2.104978619       | 0.023                    |
| M-CSF                 | 1.910152053       | 0.009                    |
| HGF                   | 1.854534665       | 0.004                    |
| BLC                   | 2.681199637       | 0.023                    |
| LGALS7                | 1.64183532        | 0.043                    |
| MMP-10                | 1.936992913       | 0.055                    |
| TNFSF14               | 3.977380107       | 0.062                    |
| HVEM                  | 1.63389031        | 0.067                    |
| NRG1-beta1            | 1.649826306       | 0.060                    |
| IP-10                 | 1.948766859       | 0.117                    |
| MIP-1alpha            | 8.279382918       | 0.120                    |
| MCP-3                 | 4.409390824       | 0.123                    |
| GITR-Ligand           | 1.654607598       | 0.006                    |
| Furin                 | 1.543881108       | 0.097                    |
| IL-1beta              | 6.093801511       | 0.147                    |
| TGF-alpha             | 1.771109789       | 0.017                    |
| FGF-7                 | 3.980751443       | 0.155                    |
| TGF-beta 3            | 6.470047599       | 0.171                    |
| MIG                   | 3.396202953       | 0.188                    |
| GDNF                  | 3.451404578       | 0.162                    |
| IL-16                 | 4.359289582       | 0.179                    |
| GCP-2                 | 5.158204396       | 0.172                    |
| KIM1/TIM1             | 1.527796623       | 0.173                    |
| SCF                   | 3.4696268         | 0.196                    |
| FGF-6                 | 4.243327461       | 0.193                    |

**Supplementary Table S6. Relationship between positive rates of IGFBP-1 and clinicopathologic features by tumour type in biomarker assessment stage**

|                                      | ESCC |              |        | EJA |              |       | Stomach cancer |              |        |
|--------------------------------------|------|--------------|--------|-----|--------------|-------|----------------|--------------|--------|
|                                      | n    | positive (%) | p      | n   | positive (%) | p     | n              | positive (%) | p      |
| <b>Patient age</b>                   |      |              |        |     |              |       |                |              |        |
| ≤55                                  | 100  | 65 (65.0%)   | 0.144  | 34  | 22 (64.7%)   | 0.060 | 82             | 42 (51.2%)   | <0.001 |
| >55                                  | 187  | 137 (73.3%)  |        | 203 | 161 (79.3%)  |       | 125            | 110 (88.0%)  |        |
| <b>Patient gender</b>                |      |              |        |     |              |       |                |              |        |
| Male                                 | 208  | 161 (77.4%)  | <0.001 | 189 | 149 (78.8%)  | .238  | 136            | 110 (80.9%)  | 0.001  |
| Female                               | 79   | 41 (51.9%)   |        | 48  | 34 (70.8%)   |       | 71             | 42 (59.2%)   |        |
| <b>T stage</b>                       |      |              |        |     |              |       |                |              |        |
| Tis+T1+T2                            | 74   | 46 (62.1%)   | 0.072  | 25  | 19 (76.0%)   | 0.878 | 34             | 18 (52.9%)   | 0.002  |
| T3+ T4                               | 213  | 156 (73.2%)  |        | 212 | 164 (77.4%)  |       | 173            | 136 (78.6%)  |        |
| <b>N stage</b>                       |      |              |        |     |              |       |                |              |        |
| Positive                             | 144  | 105 (72.9%)  | 0.346  | 164 | 125 (76.2%)  | 0.584 | 57             | 37 (64.9%)   | 0.087  |
| Negative                             | 143  | 97 (67.8%)   |        | 73  | 58 (79.5%)   |       | 150            | 115(76.7%)   |        |
| <b>Early-stage VS advanced-stage</b> |      |              |        |     |              |       |                |              |        |
| Early (0+I+II)                       | 118  | 84 (71.2%)   | 0.803  | 56  | 47 (83.9%)   | 0.171 | 66             | 41 (62.1%)   | 0.012  |
| Advanced (III+IV)                    | 169  | 118 (69.8%)  |        | 181 | 136 (75.1%)  |       | 141            | 111 (78.7%)  |        |

NOTE: Statistical significance was determined by means of Chi-squared test. ESCC, oesophageal squamous cell carcinoma. EJA, oesophagogastric junction adenocarcinoma.



**Supplementary Table S7· Diagnostic performance of IGFBP-1 for ESCC in biomarker validation stage**

|                                 | AUC (95%CI)         | Sensitivity (95%CI)    | Specificity (95%CI)    | PPV    | NPV    | PLR   | NLR   |
|---------------------------------|---------------------|------------------------|------------------------|--------|--------|-------|-------|
| <b>Validation cohort 1</b>      |                     |                        |                        |        |        |       |       |
| ESCC (all stages) VS. Control   | 0·887 (0·858-0·916) | 70·68% (65·25%-75·72%) | 89·09% (83·31%-93·41%) | 92·33% | 62·07% | 6·478 | 0·329 |
| Early stage ESCC VS. Control    | 0·849 (0·799-0·899) | 67·01% (56·73%-76·22%) | 89·09% (83·31%-93·41%) | 78·30% | 82·14% | 6·142 | 0·370 |
| Advanced stage ESCC VS. Control | 0·905 (0·875-0·934) | 71·90% (65·31%-77·87%) | 89·09% (83·31%-93·41%) | 89·35% | 71·36% | 6·590 | 0·315 |
| <b>Validation cohort 2</b>      |                     |                        |                        |        |        |       |       |
| ESCC (all stages) VS. Control   | 0·909 (0·883-0·934) | 73·28% (67·49%-78·54%) | 87·89% (82·39%-92·17%) | 89·31% | 70·43% | 6·051 | 0·304 |
| Early stage ESCC VS. Control    | 0·911 (0·880-0·941) | 71·63% (63·43%-78·90%) | 87·89% (82·39%-92·17%) | 81·45% | 80·67% | 5·915 | 0·323 |
| Advanced stage ESCC VS. Control | 0·906 (0·870-0·942) | 75·21% (66·53%-82·60%) | 87·89% (82·39%-92·17%) | 79·81% | 84·78% | 6·211 | 0·282 |

CI, exact confidence interval; ESCC, oesophageal squamous cell carcinoma; NLR, negative likelihood ratio; NPV, negative predictive value; PLR, positive likelihood ratio; PPV, positive predictive value.

**Supplementary Table S8. Relationship between positive rates of IGFBP-1 and clinicopathologic features of ESCC patients in biomarker validation stage**

|                                      | Validation cohort 1 (CHSUMC) |              |       | Validation cohort 1 (CHSUMC) |              |       |
|--------------------------------------|------------------------------|--------------|-------|------------------------------|--------------|-------|
|                                      | n                            | Positive (%) | p     | n                            | Positive (%) | p     |
| <b>Patient age</b>                   |                              |              |       |                              |              |       |
| ≤55                                  | 76                           | 48 (63.2%)   | 0.033 | 69                           | 47 (68.1%)   | 0.161 |
| >55                                  | 231                          | 175 (75.8%)  |       | 193                          | 148 (76.7%)  |       |
| <b>Patient gender</b>                |                              |              |       |                              |              |       |
| Male                                 | 232                          | 177 (76.3%)  | 0.012 | 208                          | 162 (77.9%)  | 0.012 |
| Female                               | 75                           | 46 (61.3%)   |       | 54                           | 33 (61.1%)   |       |
| <b>T stage</b>                       |                              |              |       |                              |              |       |
| Tis + T1 + T2                        | 78                           | 51 (65.4%)   | 0.096 | 105                          | 70 (66.7%)   | 0.019 |
| T3 + T4                              | 229                          | 172 (75.1%)  |       | 157                          | 125 (79.6%)  |       |
| <b>N stage</b>                       |                              |              |       |                              |              |       |
| Positive                             | 162                          | 118 (72.8%)  | 0.933 | 129                          | 95 (73.6%)   | 0.774 |
| Negative                             | 145                          | 105 (72.4%)  |       | 133                          | 100 (75.2%)  |       |
| <b>Early-stage VS advanced-stage</b> |                              |              |       |                              |              |       |
| Early (0+I+II)                       | 97                           | 66 (68.0%)   | 0.219 | 141                          | 102 (72.3%)  | 0.403 |
| Advanced (III+IV)                    | 210                          | 157 (74.8%)  |       | 121                          | 93 (76.9%)   |       |

CHSUMC, Cancer Hospital of Shantou University Medical College; SYSUCC, Sun Yat-Sen University Cancer Centre; ESCC, oesophageal squamous cell carcinoma.

**Supplementary Table S9. Diagnostic performance of different biomarkers in ESCC**

|                       | AUC (95%CI)         | Sensitivity (95%CI)    | Specificity (95%CI)    | PPV    | NPV    | PLR   | NLR   |
|-----------------------|---------------------|------------------------|------------------------|--------|--------|-------|-------|
| <b>All stages</b>     |                     |                        |                        |        |        |       |       |
| CEA                   | 0.542 (0.443-0.642) | 14.58% (8.21%-23.26%)  | 93.33% (81.73%-98.60%) | 82.35% | 33.85% | 2.186 | 0.915 |
| Cyfra21-1             | 0.689 (0.603-0.775) | 43.75% (33.64%-54.25%) | 86.67% (73.21%-94.95%) | 87.51% | 41.92% | 3.282 | 0.649 |
| SCCA                  | 0.581 (0.489-0.673) | 32.29% (23.10%-42.61%) | 93.33% (81.73%-98.60%) | 91.18% | 39.23% | 4.481 | 0.725 |
| CEA+ Cyfra21-1+SCCA   | 0.707 (0.623-0.791) | 41.67% (31.68%-52.18%) | 93.33% (81.73%-98.60%) | 93.03% | 42.84% | 6.247 | 0.625 |
| IGFBP-1               | 0.895 (0.845-0.948) | 75.00% (65.12%-83.28%) | 84.44% (70.54%-93.51%) | 91.14% | 61.27% | 4.820 | 0.296 |
| <b>Early stage</b>    |                     |                        |                        |        |        |       |       |
| CEA                   | 0.542 (0.427-0.656) | 16.98% (8.07%-29.80%)  | 93.33% (81.73%-98.60%) | 75.00% | 48.82% | 2.546 | 0.890 |
| Cyfra21-1             | 0.673 (0.567-0.779) | 39.62% (21.89%-48.36%) | 86.67% (73.21%-94.95%) | 77.79% | 54.91% | 2.972 | 0.697 |
| SCCA                  | 0.495 (0.376-0.615) | 28.30% (16.79%-42.38%) | 93.33% (81.73%-98.60%) | 83.34% | 52.48% | 4.243 | 0.768 |
| CEA+ Cyfra21-1+SCCA   | 0.692 (0.587-0.797) | 39.62% (26.45%-54.00%) | 93.33% (81.73%-98.60%) | 87.50% | 56.74% | 5.940 | 0.647 |
| IGFBP-1               | 0.901 (0.843-0.960) | 77.36% (63.79%-87.72%) | 84.44% (70.54%-93.51%) | 85.42% | 75.99% | 4.972 | 0.268 |
| <b>Advanced stage</b> |                     |                        |                        |        |        |       |       |
| CEA                   | 0.543 (0.422-0.665) | 11.63% (3.885%-25.08%) | 93.33% (81.73%-98.60%) | 62.53% | 52.46% | 1.744 | 0.947 |
| Cyfra21-1             | 0.709 (0.596-0.821) | 48.84% (33.31%-64.54%) | 86.67% (73.21%-94.95%) | 77.81% | 63.90% | 3.664 | 0.590 |
| SCCA                  | 0.687 (0.572-0.801) | 37.21% (22.98%-53.28%) | 93.33% (81.73%-98.60%) | 84.22% | 60.83% | 5.579 | 0.673 |
| CEA+ Cyfra21-1+SCCA   | 0.726 (0.619-0.834) | 41.86% (27.01%-57.87%) | 93.33% (81.73%-98.60%) | 85.73% | 62.65% | 6.276 | 0.623 |
| IGFBP-1               | 0.887 (0.817-0.957) | 74.42% (58.83%-86.48%) | 84.44% (70.54%-93.51%) | 82.52% | 79.14% | 4.932 | 0.275 |

CEA, carcinoembryonic antigen; SCCA, squamous cell carcinoma antigen; CI, exact confidence interval; NC, normal controls; ESCC, oesophageal squamous cell carcinoma; NLR, negative likelihood ratio; NPV, negative predictive value; PLR, positive likelihood ratio; PPV, positive predictive value.

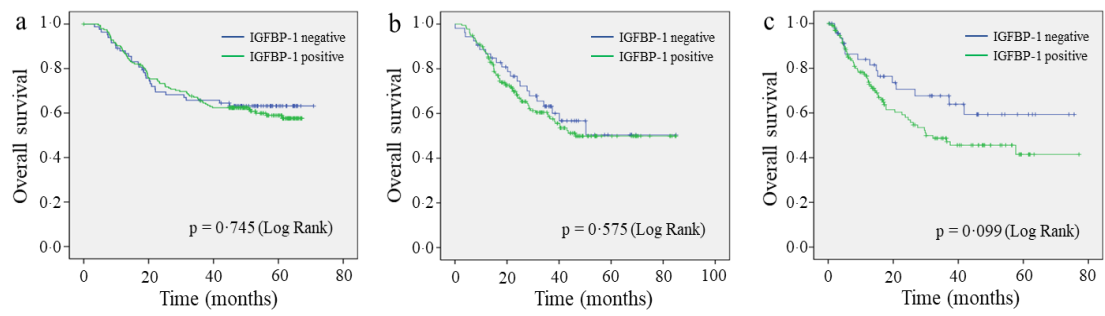

**Supplementary Figure S1.** Kaplan-Meier analysis of the overall survival for serum IGFBP-1 in oesophageal squamous cell carcinoma (a), oesophagogastric junction adenocarcinomas (b) and stomach cancer (c) in biomarker assessment stage.
